# Supplementary material
Source: Springer Nature journal article supplement (https://www.springermedizin.de/resource/supplementary/12936_2014_3658_MOESM3_ESM.pdf/9546178)

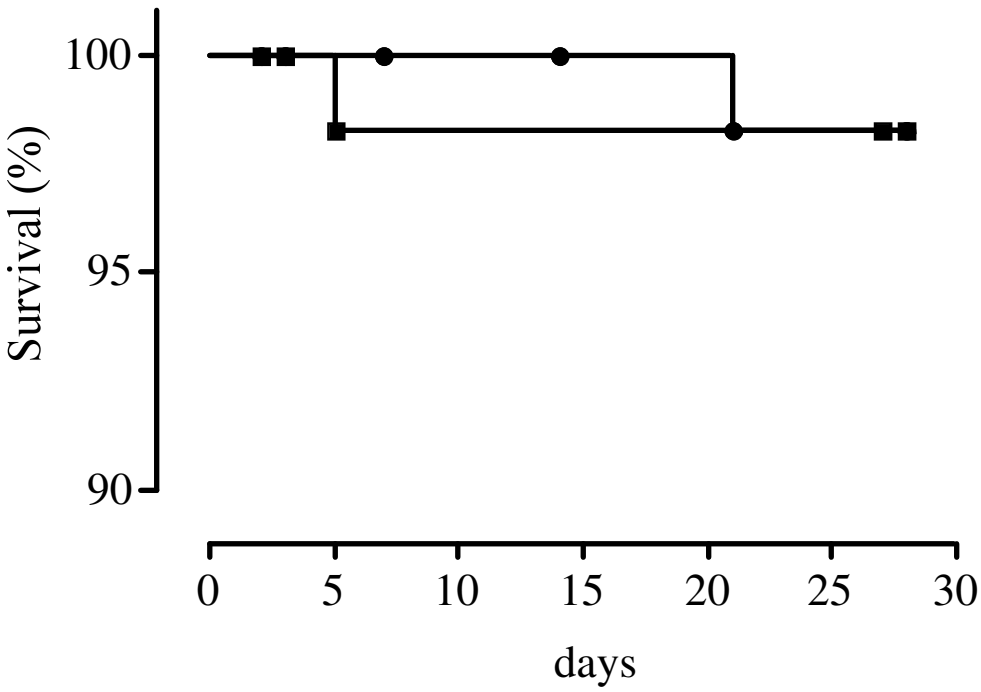

Supplement: MOESM3 [file 9546178]
